# Supplementary material for: A Novel Green Synthesis of Thalidomide and Analogs
Source: Hindawi journal article supplement (doi:10.1155/2017/6436185), 2017-01-01
Supplement: f1 [file 6436185.f1.docx]

A Novel Green Synthesis of Thalidomide and Analogs

Ellis Benjamin1 and Yousef M. Hijji2*

1Department of Chemistry, Stockton University 101 Vera King Farris Drive,Galloway, NJ 08205-9441. 2Department of Chemistry and Earth Sciences, Qatar University, P.O. Box 2713, Doha, Qatar

[*yousef.hijji@qu.edu.qa*](mailto:yousef.hijji@qu.edu.qa)

**GC-MS and NMR Spectra for**

**2-(2,6-Dioxo-piperidin-3-yl)-isoindole-1,3-dione (1).**

**2-(2,6-Dioxo-piperidin-3-yl)-hexahydro-isoindole-1,3-dione (2).**

**3-(2,5-Dioxo-pyrrolidin-1-yl)-piperidine-2,6-dione (3).**

**3-(2,6-Dioxo-piperidin-3-yl)-3-aza-bicyclo[3.2.0]heptane-2,4-dione (4).**

**2-(2,6-dioxopiperidin-3-yl)-3a,4,7,7a-tetrahydro-1H-4,7-ethanoisoindole-1,3(2H)-dione (5).**

1. **Experimental:**

Standardized methods for the identification of products consisted of (GC - MS), 1H NMR, 13C NMR, DEPT-C NMR, Melting Point, and Infrared Spectroscopy (IR). Every new compound synthesized was completely analyzed by all corresponding techniques. Gas Chromatograph Mass Spectrometry was performed using either a Shimadzu GC-17A and GC - MS-QP5050A LabSolutions system or a Varian CP 3800 and Saturn 2200 system.

1H, 13C and DEPT-C NMR were performed on a Bruker 400 MHz in DMSO.d6. All solvent (HPLC grade) were purchased from Fisher Scientific Corporation. All reagents were purchased from Aldrich Chemical Company and were used without purification.

**GC –MS Spectra and NMR spectra for compounds 1-5**

**2-(2,6-Dioxo-piperidin-3-yl)-isoindole-1,3-dione ( 1)**

**GC-MS:**

Figure 1: GC chromatogram and MS spectra of Thalidomide.

Figure 2: H-NMR of Thalidomide (**1**)

Figure 3: H-NMR of Thalidomide (**1**)Zoomed

Figure 4 :13C-NMR of thalidomide (**1**)

**2-(2,6-Dioxo-piperidin-3-yl)-hexahydro-isoindole-1,3-dione**

Figure 5: GC chromatogram and MS spectra of compound **2**

Figure 6: H-NMR of compound (**2**)

Figure 7: H-NMR of compound (**2**)zoomed

Figure 8: H-NMR of compound (**2**) zoomed.

Figure 9: 13C-NMR of compound (**2**)

**3-(2,5-Dioxo-pyrrolidin-1-yl)-piperidine-2,6-dione:**

Figure 10: GC chromatogram and MS spectra of (3)

```

Figure 11: H-NMR of compound (**3)**

Figure 12: H-NMR of compound (**3)** zoomed.

Figure 13: H-NMR of compound (**3)** Zoomed

Figure 14: 13C-NMR of compound (**3**)

**3-(2,6-Dioxo-piperidin-3-yl)-3-aza-bicyclo[3.2.0]heptane-2,4-dione:**

GC-MS chromatogram of compound **3**.

Figure 15: MS- Spectrum of Compound (**4**)

Figure 16: H-NMR Spectrum of compound (**4**)

Figure 17: H-NMR spectrum of compound (**4**) zoomed

Figure 18: H-NMR spectrum of compound (**4**) zoomed.

Figure 19: C-13 NMR ( 100 MHZ) spectra of compound (**4).**

**2-(2,6-dioxopiperidin-3-yl)-3a,4,7,7a-tetrahydro-1H-4,7-ethanoisoindole-1,3(2H)-dione:**

Figure 20: GC-MS spectrum of compound (**5**)

Figure 21: H-NMR spectrum of compound (**5**)

Figure 22: H-NMR spectrum of compound (**5**) zoomed.

Figure 23: H-NMR spectrum of compound (**5**) zoomed.

Figure 24: C-13 NMR spectrum of compound (**5**).
